# Supplementary material
Source: publisher figshare collection journal article supplement (https://tandf.figshare.com/ndownloader/files/24463240)
Supplement: Supplementary file 1 [file 24463240]

Appendix 3. Baseline characteristics of patients with T2DM in Taiwan.

| Patient baseline | Value | References |
| --- | --- | --- |
| Current Age (Years) | 60.42 | (1) |
| Proportion of female | 0.52 | (1) |
| Duration of diabetes (Years) | 4.58 | (1) |
| Height (m) | 1.62 | (2) |
| Proportion of smokers | 0.15 | (1) |
| Modifiable risk factors |  |  |
| HbA1c (%) | 7.54 | (1) |
| Total-Cholesterol (mg/dL) | 194.26 | (1) |
| HDL Cholesterol (mg/dL) | 46.40 | (1) |
| LDL Cholesterol (mg/dL) | 118.13 | (1) |
| Systolic blood pressure (mmHg) | 133.33 | (1) |
| Weight (kg) | 67.63 | (1, 2, 3) |
| Percentage with clinical history |  |  |
| Atrial fibrillation | NA |  |
| Peripheral vascular disease | 0.45 | (1) |
| Ischemic heart disease | 9.71 | (1) |
| Myocardial infarction | 0.81 | (1) |
| Congestive heart failure | 14.53 | (1) |
| Stroke | 3.09 | (1) |
| Amputation | 0.11 | (1) |
| Blindness | NA |  |
| End-stage renal disease | NA |  |

NA: not applicable.

References

1. Chen YW: The relationships of diabetes medication on the risk of acute myocardial infarction, stroke, heart failure, and death in patients with type 2 diabetes - Participants in National Diabetes Care Management Program. *master's thesis.* China Medical University, 2013.
2. Department of Statistics, Ministry of Health and Welfare, the Republic of China (R.O.C.). Mean height, weight, and BMI for adults aged 19-64 years in all regions of Taiwan. Available at: https://dep.mohw.gov.tw/DOS/cp-1720-7366-113.html. Accessed February 18, 2020.
3. Hall DM, Cole TJ: What use is the BMI? *Arch Dis Child* 2006, 91:283-286.
